# Supplementary material for: Niasite and johanngeorgenstadtite, Ni&lt;sup&gt;2+&lt;/sup&gt;&lt;sub&gt;4.5&lt;/sub&gt;(AsO&lt;sub&gt;4&lt;/sub&gt;)&lt;sub&gt;3&lt;/sub&gt; dimorphs from Johanngeorgenstadt, Germany
Source: Copernicus journal article supplement (doi:10.5194/ejm-32-373-2020), 2020-06-30
Supplement: Supplementary file [file ejm-32-373-2020-supplement-title-page.pdf › ejm-32-373-2020-supplement-title-page.pdf]

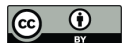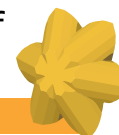

*Supplement of*

**Niasite and johanngeorgenstadtite,  $\text{Ni}_{4.5}^{2+}(\text{AsO}_4)_3$  dimorphs from Johanngeorgenstadt, Germany**

**Anthony R. Kampf et al.**

*Correspondence to:* Anthony R. Kampf ([akampf@nhm.org](mailto:akampf@nhm.org))

- [ejm-32-373-2020-supplement-title-page.pdf](#)
- [johanngeorgenstadtite.cif](#)
- [niasite.cif](#)

The copyright of individual parts of the supplement might differ from the CC BY 4.0 License.
